# Supplementary material
Source: PubMed Central journal article supplement (PMC3903192)
Supplement: 1321860111_pnas.201321860SI.pdf [file 1321860111_pnas.201321860SI.pdf]

# Supporting Information

Pierron et al. 10.1073/pnas.1321860111

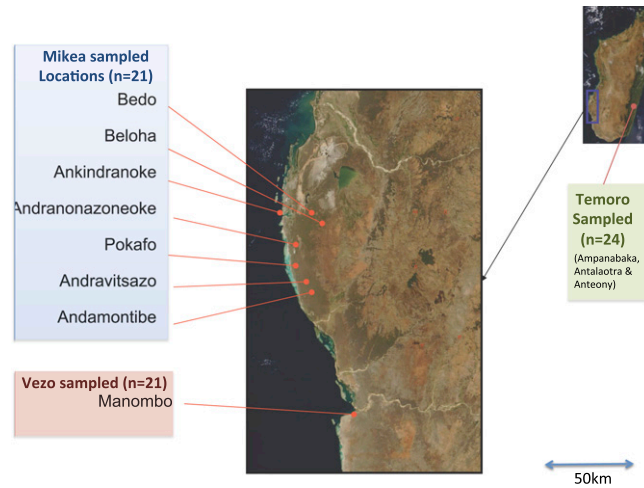

Fig. S1. Location of the genetic sampling in Madagascar.

### Cross-validation Austronesian component

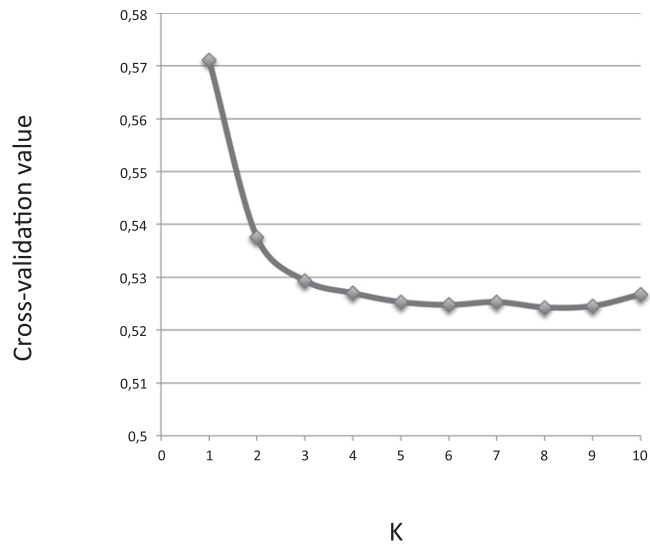

### Austronesian component STRUCTURE-like chart for several K values

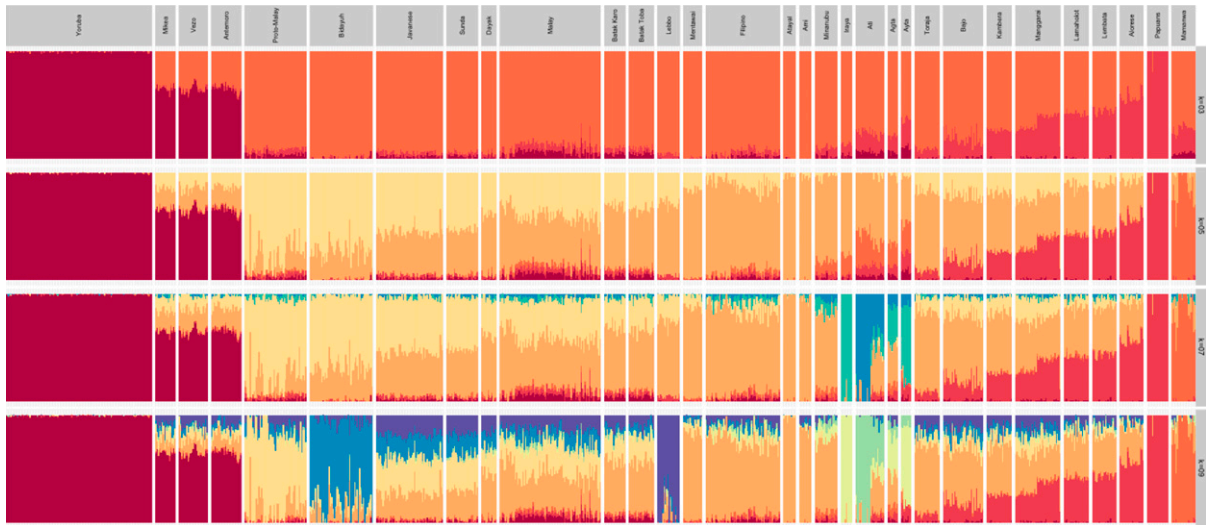

Fig. S2. (Continued)

### Cross-validation African component

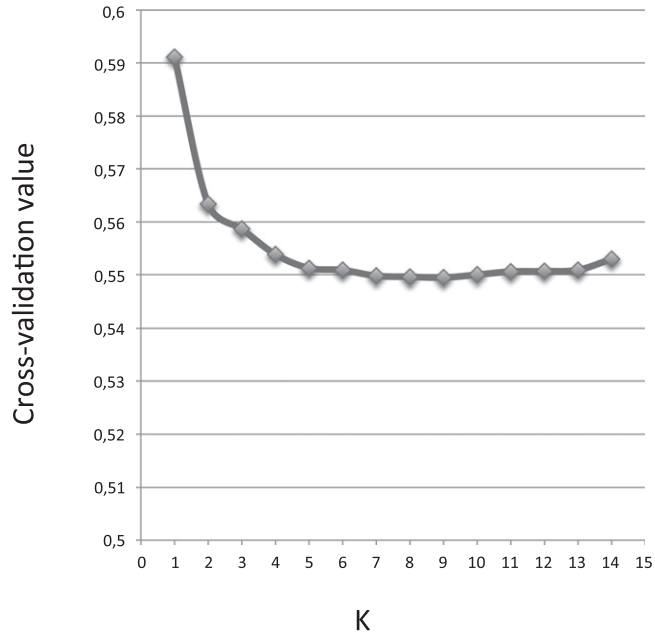

### African component STRUCTURE-like chart for several K values

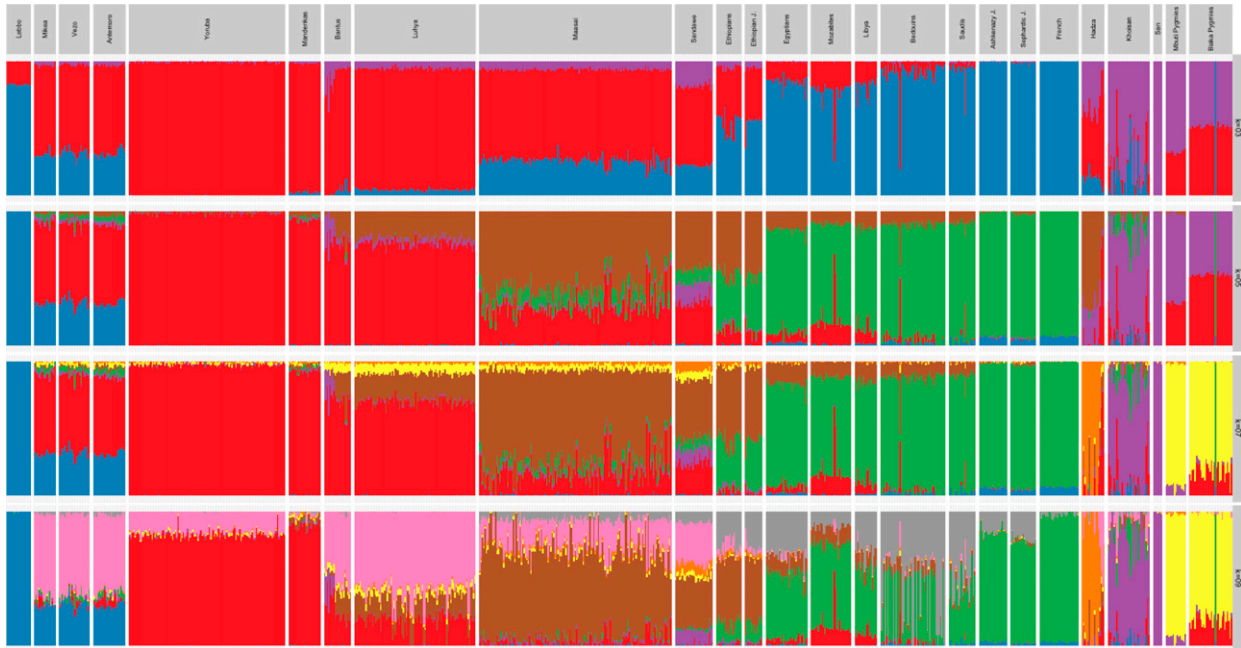

Fig. S2. ADMIXTURE results on Austronesian and African components.

**Table S1. Estimates of genetic diversity and African ancestry in three Malagasy populations**

| Populations | <i>n</i> | Genetic diversity | % of African ancestry ( $\pm$ SD)<br>(ADMIXTURE analysis, $K = 02$ ) |                  |
|-------------|----------|-------------------|----------------------------------------------------------------------|------------------|
|             |          | 1-IBS ( $\pm$ SD) | Test A                                                               | Test B           |
| Mikea       | 21       | 25.3% $\pm$ 1.25  | 68.21 $\pm$ 2.31                                                     | 68.71 $\pm$ 2.10 |
| Temoro      | 24       | 25.6% $\pm$ 0.17  | 67.15 $\pm$ 3.86                                                     | 67.81 $\pm$ 0.34 |
| Vezo        | 24       | 25.7% $\pm$ 0.32  | 66.28 $\pm$ 4.54                                                     | 66.47 $\pm$ 2.10 |
| All         | 69       | 25.7% $\pm$ 0.45  | 67.19 $\pm$ 3.76                                                     | 67.50 $\pm$ 3.23 |

Estimates of genetic diversity from IBS analysis and African ancestry in three Malagasy populations from the two distinct analyses with ADMIXTURE, test A was focused on the Indonesian origin and test B on the African origin. IBS, identity-by-state distance.

**Table S2. Overlaps of iHS signals among populations**

| Malagasy     | Overlap with top 5% iHS windows in second population |       |      |      |       |              |              |
|--------------|------------------------------------------------------|-------|------|------|-------|--------------|--------------|
|              | Temoro                                               | Mikea | Vezo | Bajo | Lebbo | CEU (Europe) | YRI (Yoruba) |
| Top 1% iHS   |                                                      |       |      |      |       |              |              |
| Temoro       |                                                      | 38.3  | 39.3 | 34.7 | 14.1  | 14.9         | 25.0         |
| Mikea        | 29.3                                                 |       | 24.1 | 19.8 | 10.9  | 13.9         | 19.3         |
| Vezo         | 41.3                                                 | 31.6  |      | 28.1 | 12.4  | 12.3         | 24.4         |
| Bajo         | 27.3                                                 | 24.3  | 24.1 |      | 23.4  | 11.2         | 14.0         |
| Lebbo        | 13.5                                                 | 8.7   | 10.6 | 18.1 |       | 7.8          | 12.4         |
| CEU (Europe) | 12.9                                                 | 13.4  | 13.8 | 10.3 | 11.1  |              | 7.8          |
| YRI (Yoruba) | 23.9                                                 | 15.4  | 20.3 | 11.0 | 7.6   | 9.0          |              |

iHS, integrated haplotype score.

**Table S3. Biological processes with less than 100 genes that were specifically enriched (EASE score <0.05) in Mikea top 5% iHS signals but not in Temoro and Vezo**

| GO ID      | Gene ontology term                                              | Windows in top 5% with this term | Windows in top 5% without this term | Overall windows with this term | Overall windows without this term | Individual genes in Mikea top 5%                                                                                                                                                  | Individual genes in 5%                      |                                            |
|------------|-----------------------------------------------------------------|----------------------------------|-------------------------------------|--------------------------------|-----------------------------------|-----------------------------------------------------------------------------------------------------------------------------------------------------------------------------------|---------------------------------------------|--------------------------------------------|
|            |                                                                 |                                  |                                     |                                |                                   |                                                                                                                                                                                   | Temoro                                      | Vezo                                       |
| GO:0014013 | Regulation of gliogenesis                                       | 11                               | 398                                 | 58                             | 6,025                             | <u>NOTCH1</u> , <u>HES5</u> , <u>SOX10</u> , <u>CLCF1</u> , <u>ID4</u> , <u>DRD3</u> , <u>CNTN2</u> , <u>PPARG</u> , <u>GFAP</u> , <u>RNF10</u>                                   | <u>HES5</u> , <u>SOX10</u> , <u>CLCF1</u>   | <u>NOTCH1</u> , <u>HES5</u> , <u>SOX10</u> |
| GO:0001561 | Fatty acid $\alpha$ -oxidation                                  | 4                                | 405                                 | 5                              | 6,078                             | <u>HAO1</u> , <u>PHYH</u> , <u>HACL1</u> , <u>PEX13</u>                                                                                                                           |                                             | <u>HAO1</u>                                |
| GO:0090330 | Regulation of platelet aggregation                              | 4                                | 405                                 | 7                              | 6,076                             | <u>SYK</u> , <u>PRKG1</u> , <u>PRKCD</u> , <u>PRKCQ</u>                                                                                                                           | <u>PRKCD</u>                                |                                            |
| GO:0051584 | Regulation of dopamine uptake                                   | 4                                | 405                                 | 8                              | 6,075                             | <u>GDNF</u> , <u>DRD3</u> , <u>DRD4</u>                                                                                                                                           |                                             | <u>GDNF</u>                                |
| GO:0002819 | Regulation of adaptive immune response                          | 11                               | 398                                 | 74                             | 6,009                             | <u>CLCF1</u> , <u>DUSP10</u> , <u>FCER1A</u> , <u>IL20RB</u> , <u>IRF7</u> , <u>LTA</u> , <u>PRKCQ</u> , <u>RC3H1</u> , <u>TBX21</u> , <u>TNF</u> , <u>TNFSF13</u> , <u>TRAF2</u> | <u>CLCF1</u> , <u>TRAF2</u> , <u>IL20RB</u> | <u>TRAF2</u> , <u>IL20RB</u>               |
| GO:0007215 | Glutamate receptor signaling pathway                            | 6                                | 403                                 | 25                             | 6,058                             | <u>GRIN1</u> , <u>GRIN2A</u> , <u>GRM5</u> , <u>GRM6</u> , <u>NRXN1</u> , <u>HOMER2</u>                                                                                           | <u>GRM5</u>                                 | <u>GRIN1</u>                               |
| GO:0006941 | Striated muscle contraction                                     | 8                                | 401                                 | 46                             | 6,037                             | <u>ADRBK1</u> , <u>CHRNA1</u> , <u>DTNA</u> , <u>PIK3CA</u> , <u>RPS6KB1</u> , <u>SLC8A1</u> , <u>TNF</u> , <u>TNNC2</u> , <u>TNNI1</u> , <u>TTN</u>                              | <u>ADRBK1</u> , <u>DTNA</u> , <u>CHRNA1</u> | <u>CHRNA1</u> , <u>TNNC2</u>               |
| GO:0071901 | Negative regulation of protein serine/threonine kinase activity | 11                               | 398                                 | 78                             | 6,005                             | <u>ABL1</u> , <u>DUSP10</u> , <u>DUSP16</u> , <u>DUSP5</u> , <u>DUSP7</u> , <u>GBA</u> , <u>GSTP1</u> , <u>LATS2</u> , <u>PRKCD</u> , <u>SPRED1</u> , <u>SPRED2</u>               | <u>GSTP1</u> , <u>PRKCD</u> , <u>SPRED2</u> | <u>PRKCD</u>                               |

Redundant terms excluded: GO:0042537, GO:0018958, GO:0051580, GO:0048710, GO:0007612, GO:0051588, GO:0051940, GO:0007216, GO:0045685, GO:0042417, GO:0045214, GO:0019395. (Underlined genes are present at least twice in the table.)

**Table S4. Top 1% signals of haplotype homozygosity (iHS) shared by all three Malagasy populations**

| Chr:Loc (Mb) | Genes contained in the 200-kb window                                                                                                                                                                                                                                                                                                                                                                                                      | YRI | CEU | Lebbo | Bajo |
|--------------|-------------------------------------------------------------------------------------------------------------------------------------------------------------------------------------------------------------------------------------------------------------------------------------------------------------------------------------------------------------------------------------------------------------------------------------------|-----|-----|-------|------|
| 7_142.4      | <u>TRBJ2-5</u> , <u>TRBJ2-3</u> , <u>TRBJ2-2P</u> , <u>TRBJ2-2</u> , <u>TRBJ2-1</u> , <u>TRBJ2-4</u> , <u>TRBJ2-6</u> , <u>TRBJ2-7</u> , <u>TRBC2</u> , <u>TRBV29-1</u> , <u>TRBV27</u> , <u>AC104597.1</u> , <u>TRBV28</u> , <u>U66061.42</u> , <u>TRBVB</u> , <u>TRBV26</u> , <u>PRSS2</u> , <u>U66061.31</u> , <u>TRPV6</u> , <u>EPHB6</u> , <u>TRBV30</u> , <u>U66061.35</u> , <u>U66061.38</u> , <u>RP11-114L10.2</u> , <u>PRSS1</u> |     |     |       |      |
| 2_27         | <u>MAPRE3</u> , <u>C2orf18</u> , <u>DPYSL5</u> , <u>CDKN2AIPNLP2</u> , <u>AC013472.4</u> , <u>CENPA</u>                                                                                                                                                                                                                                                                                                                                   |     |     | **    | *    |
| 9_100.6      | <u>HEMGN</u> , <u>C9orf156</u> , <u>ANP32B</u> , <u>FOXE1</u> , <u>RP11-535C21.3</u> , <u>Y_RNA</u> <u>U6</u>                                                                                                                                                                                                                                                                                                                             | **  |     |       |      |
| 8_72         | <u>EYA1</u> , <u>RP11-326E22.1</u>                                                                                                                                                                                                                                                                                                                                                                                                        |     |     | *     | *    |
| 2_177.6      | <u>FUCA1P1</u> , <u>AC092162.2</u> , <u>AC073636.1</u> , <u>AC092162.1</u> , <u>U6</u>                                                                                                                                                                                                                                                                                                                                                    |     |     | *     | **   |
| 2_125.6      | <u>CNTNAP5</u> , <u>RN55102</u> , <u>U6</u>                                                                                                                                                                                                                                                                                                                                                                                               |     |     |       |      |
| 2_72.4       | <u>EXOC6B</u> , <u>AC006461.2</u>                                                                                                                                                                                                                                                                                                                                                                                                         |     |     |       |      |
| 13_61.4      | <u>RP11-196P2.1</u>                                                                                                                                                                                                                                                                                                                                                                                                                       |     |     |       | *    |

Signals that appear also at top 1% or top 5% in Yoruba (YRI), European (CEU), Lebbo, or Bajo populations are shown with \*\* or \*, respectively.
